# Supplementary material
Source: publisher figshare collection journal article supplement (https://acs.figshare.com/ndownloader/files/24168800)
Supplement: Supplementary file 1 [file 24168800]

## Supporting Information

### *Juglans* Sporopollenin for High-Performance Supercapacitor Electrodes Design

Funda Ersoy Atalay<sup>1,\*</sup>, Alper Bingol<sup>1</sup>, Harun Kaya<sup>2</sup>, Yıldız Emre<sup>1</sup>, Hatice Hande Bas<sup>1</sup>, Ayse Asiye Culum<sup>3</sup>

<sup>1</sup>Inonu University, The Faculty of Science and Arts, Department of Physics, Malatya, Turkey

<sup>2</sup>Malatya Turgut Ozal University, The Faculty of Engineering and Natural Sciences Malatya, Turkey

<sup>3</sup>Inonu University, The Faculty of Science and Arts, Department of Biology, Malatya, Turkey

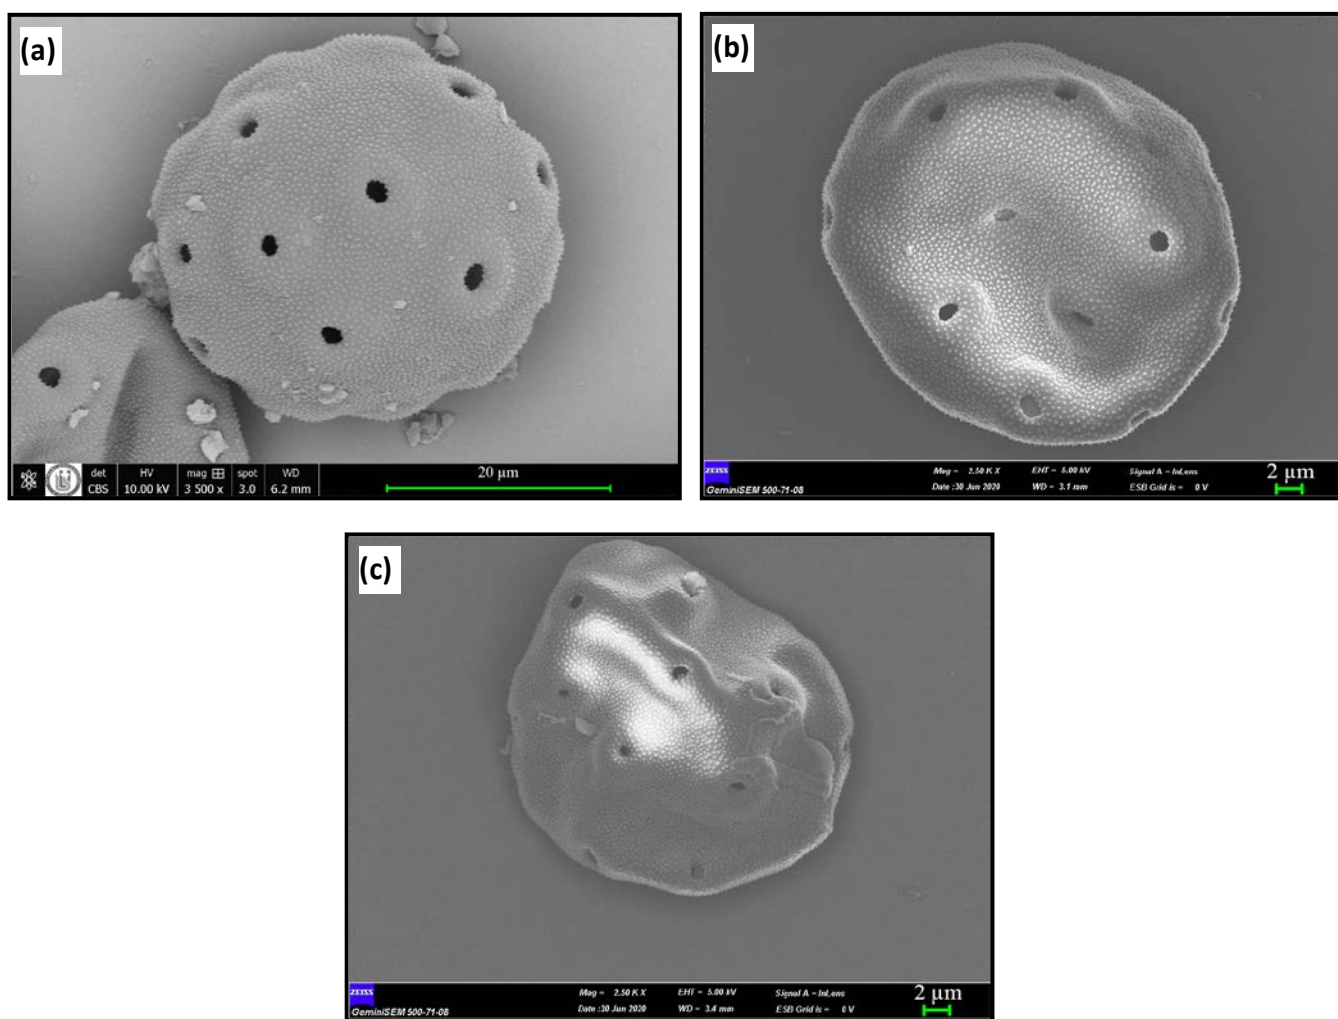

**Figure S1:** FESEM images of *Juglans* sporopollenin exine microcapsules (SECs) (a) bare SEC, (b) annealed SEC at 300 °C, (c) annealed SEC at 360 °C.

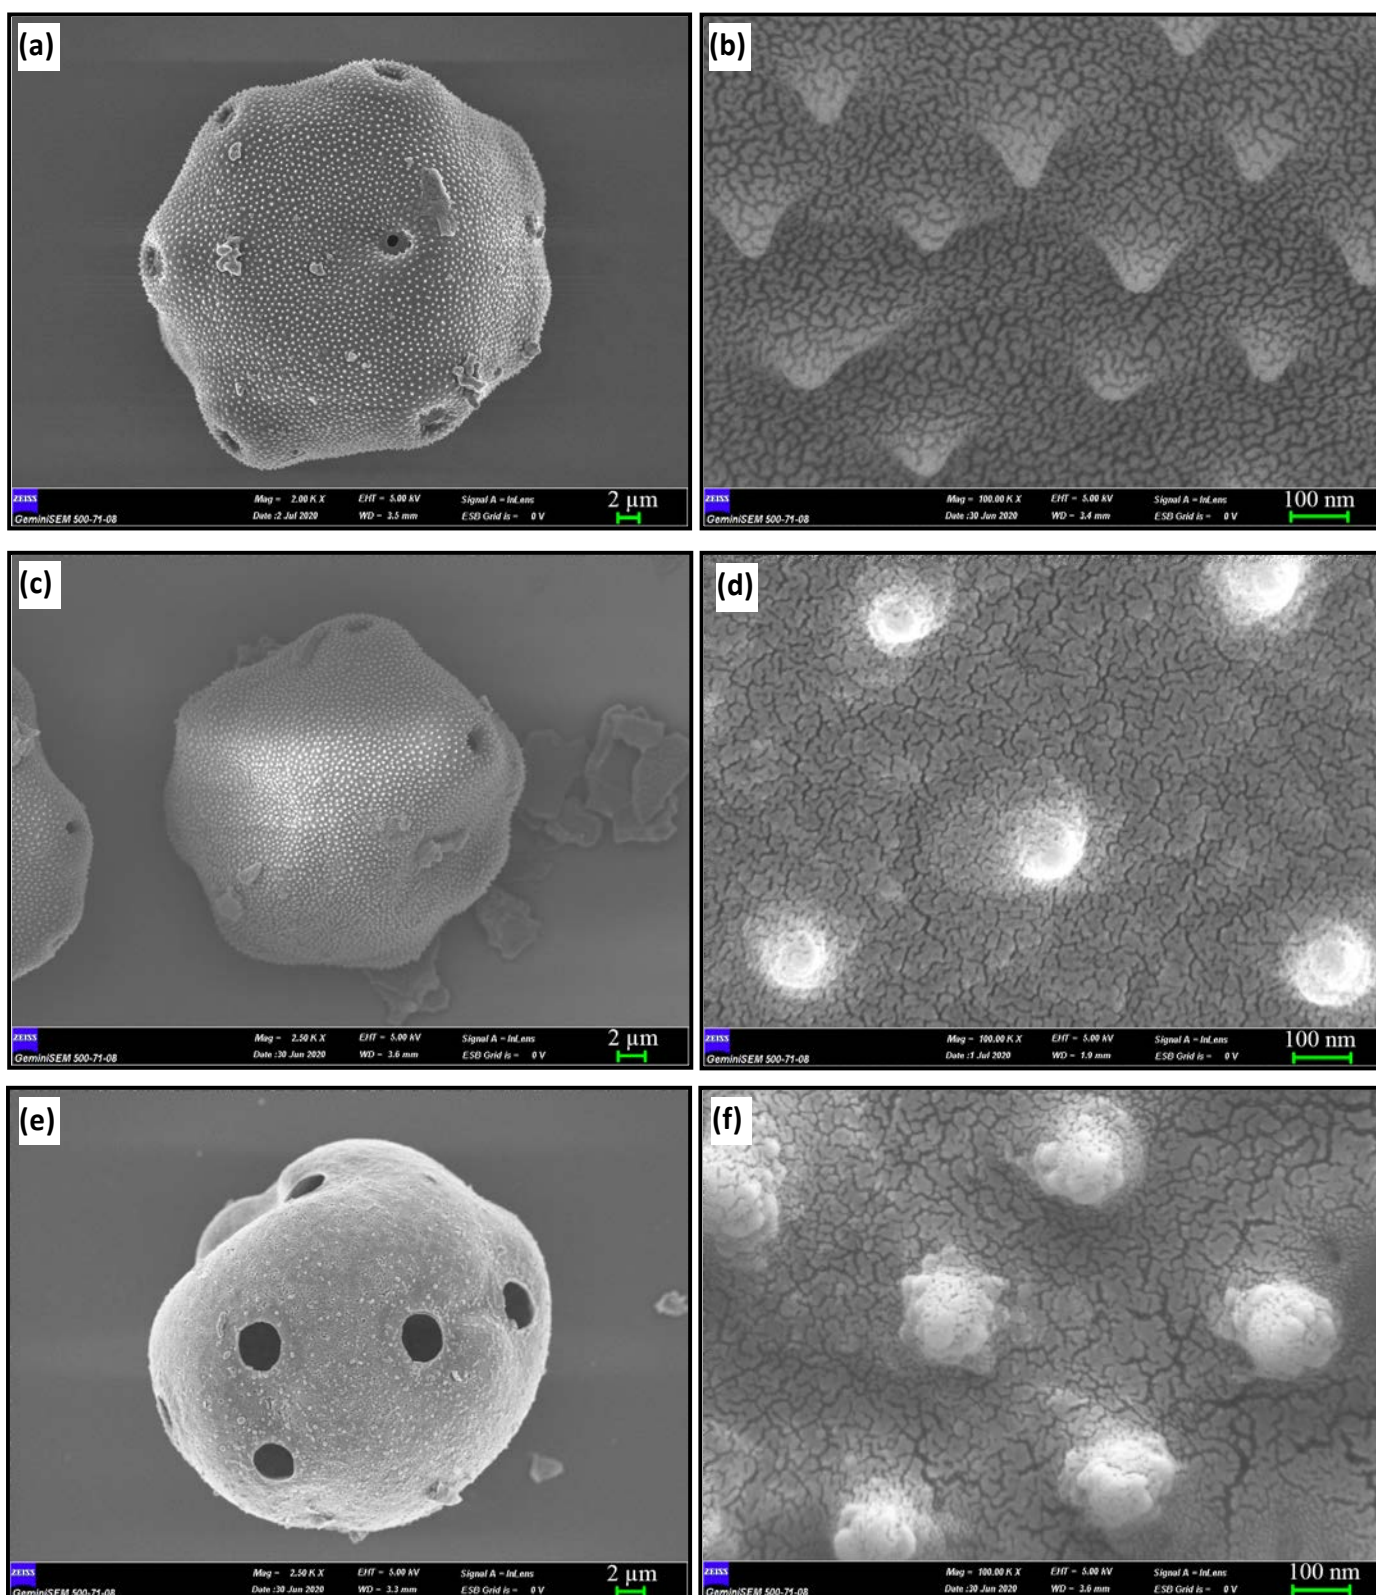

**Figure S2:** Cobalt coated *Juglans* SECs (a-b) after hydrothermal reactions (CoSEC), after annealing process, (c-d) CoSEC- 300, (e-f) CoSEC- 360.

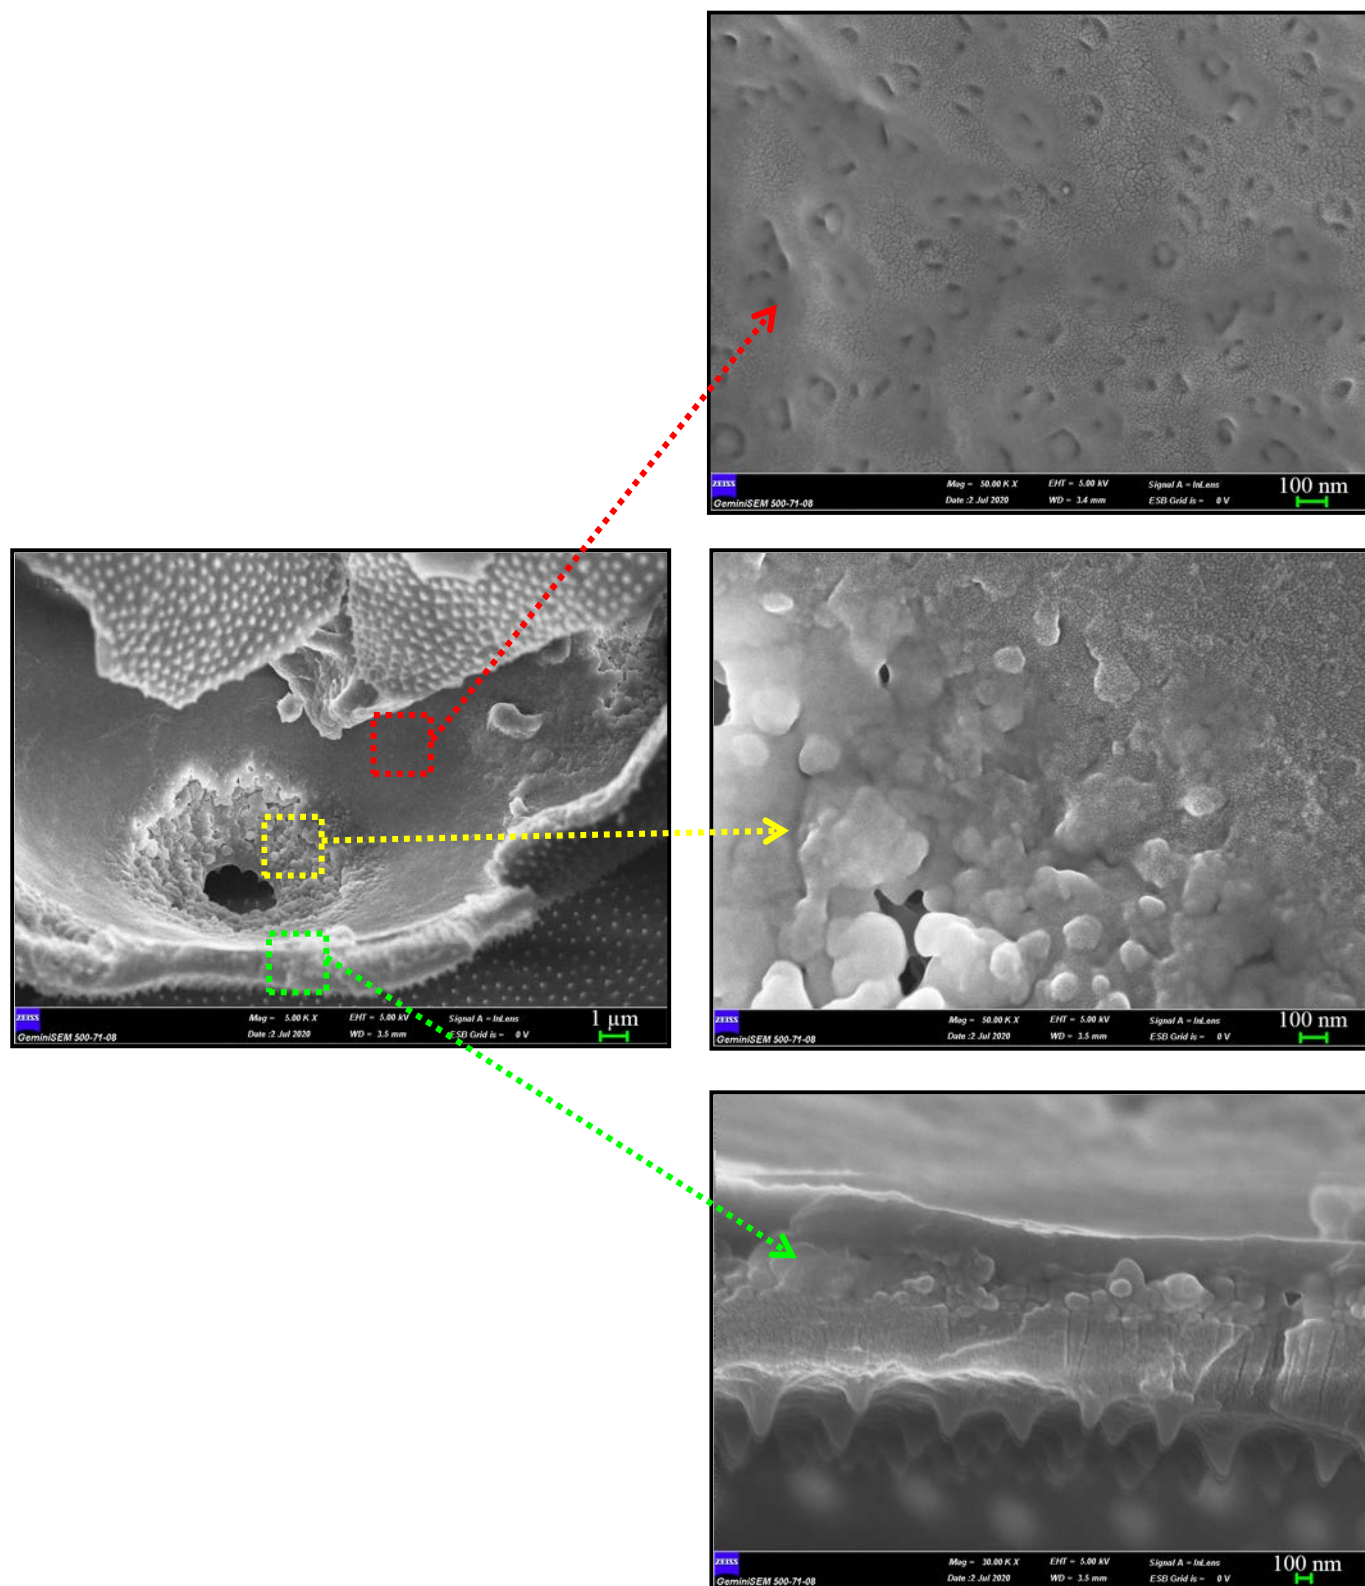

**Figure S3:** FESEM images of the inside of CoSEC after hydrothermal reaction.



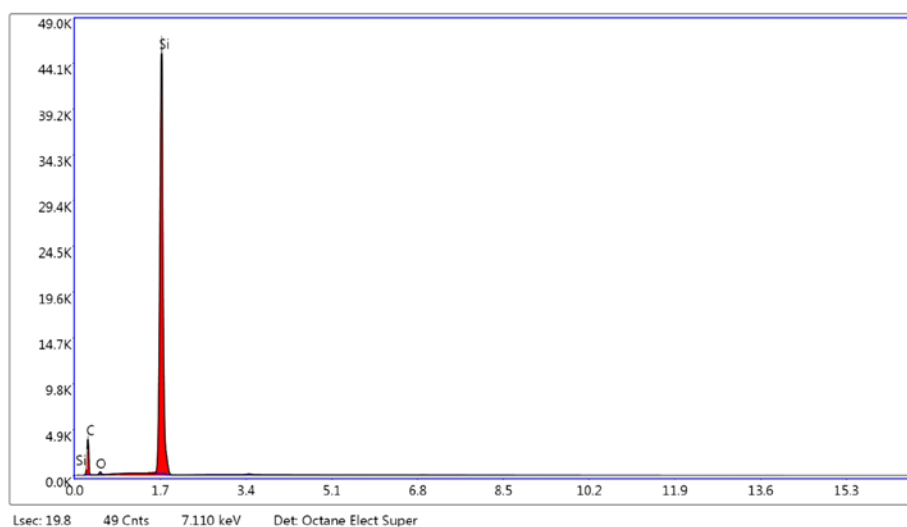

**Figure S4:** EDX spectrum of the inside of CoSEC after hydrothermal reaction.

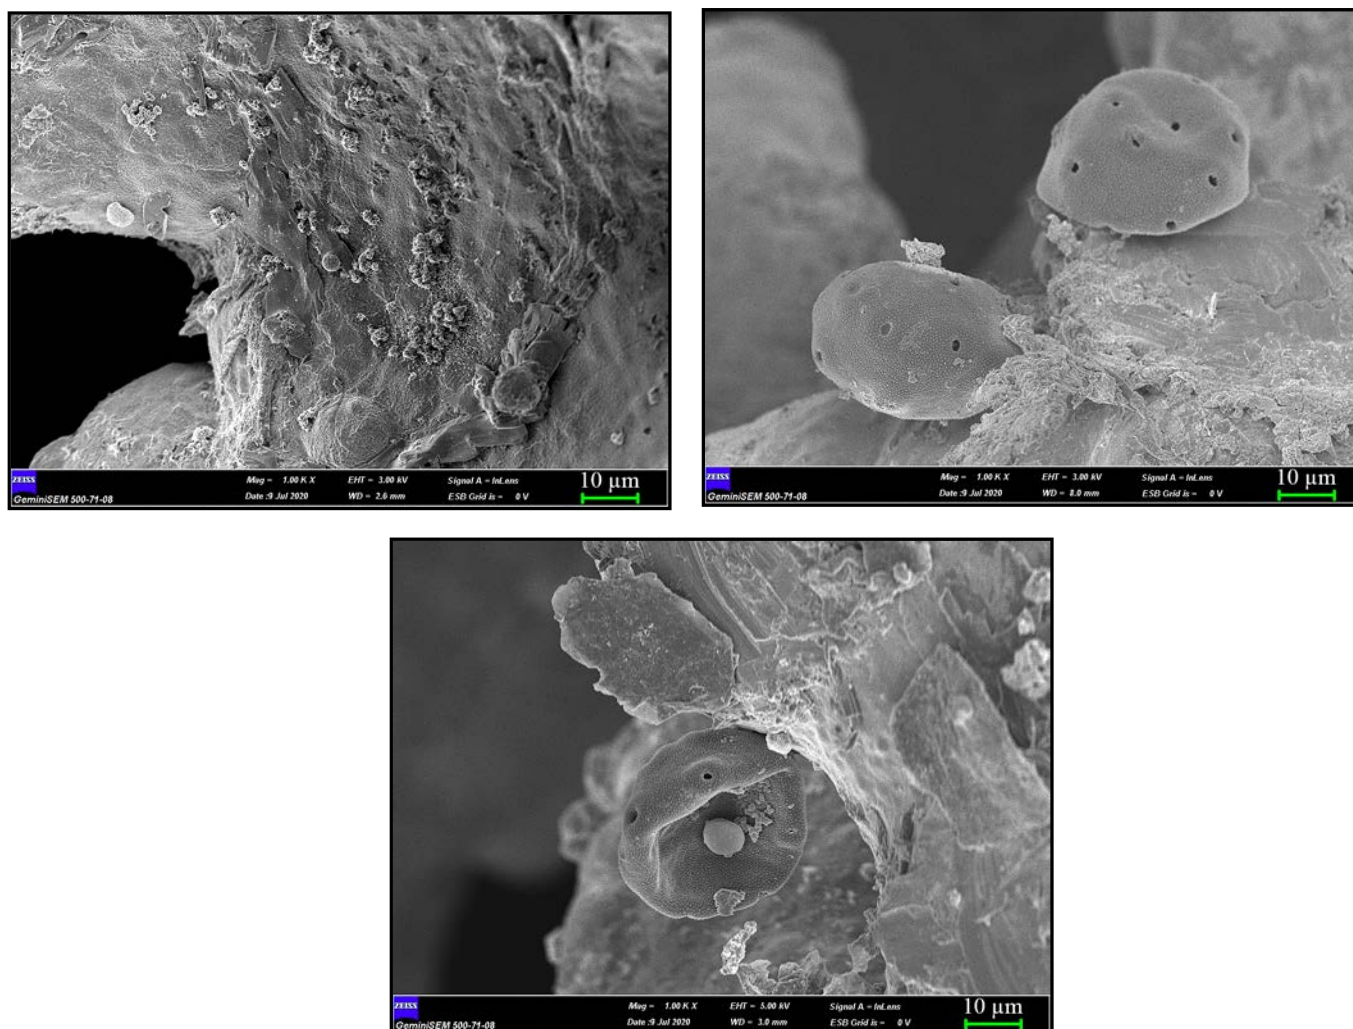

**Figure S5:** FESEM images of CoSEC/NF-300 electrode after long term cycle test in 6M KOH electrolyte.

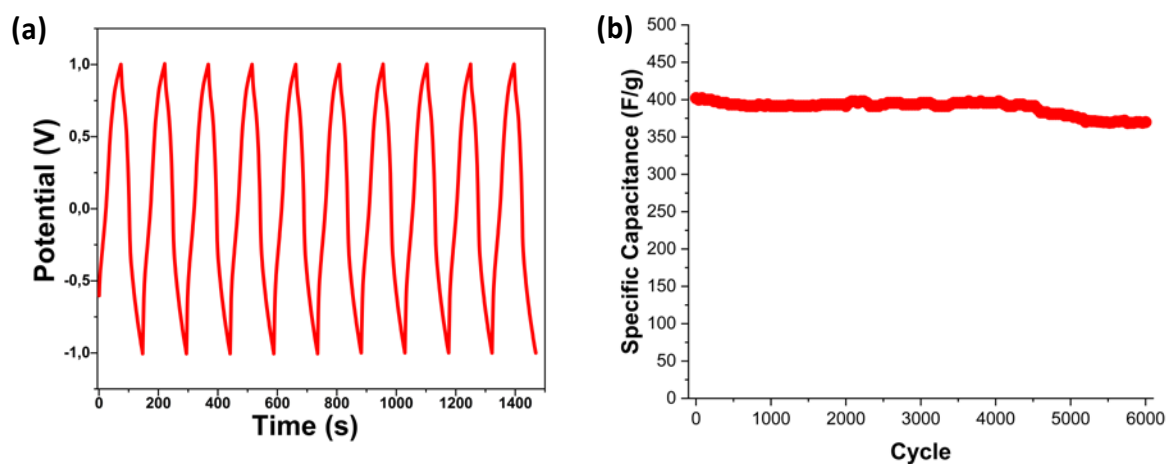

**Figure S6:** Electrochemical performance of asymmetric CoSEC-300/NF//AC supercapacitor. a) Galvanostatic first ten CD curves, b) Long term cycle stability at  $5 \text{ A g}^{-1}$ .

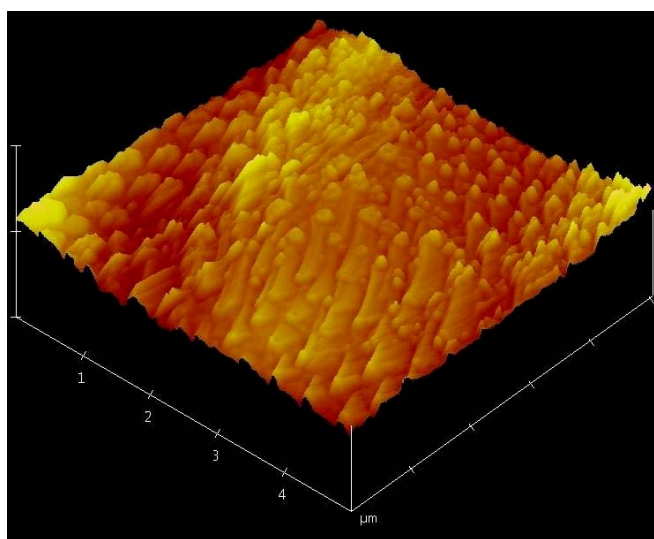

**Figure S7:** AFM image of SEC.
